# Supplementary material
Source: Royal Society of Chemistry journal article supplement (doi:10.1039/d6cp00176a)
Supplement: d6cp00176a1.pdf [file d6cp00176a1.pdf]

## Supporting Information

### **Terminal Group Engineering in Small Molecule Acceptors: A First Principles Approach to Improving Organic Solar Cell Performance**

Rinki Deka<sup>1</sup> and Dhruba Jyoti Kalita<sup>1,\*</sup>

Department of Chemistry, Gauhati University, Guwahati-781014, India

E-mail: [dhrubajyoti.kalita@gauhati.ac.in](mailto:dhrubajyoti.kalita@gauhati.ac.in)

Table S1 : Coordinates of the designed compounds in the angstrom unit.

#### 1. Compound A1

| Atoms | Coordinates (Angstroms) |           |           |
|-------|-------------------------|-----------|-----------|
|       | X                       | Y         | Z         |
| S     | -3.588501               | 1.634208  | 0.113986  |
| C     | -4.956817               | 0.507436  | -0.016645 |
| C     | -2.418626               | 0.332632  | -0.180872 |
| C     | -4.475088               | -0.818936 | -0.291725 |
| C     | -3.119238               | -0.903951 | -0.377660 |
| C     | -1.044983               | 0.484486  | -0.212981 |
| C     | -0.217820               | 1.632838  | -0.073440 |
| C     | 1.135967                | 1.417278  | -0.172506 |
| C     | 1.541992                | 0.071759  | -0.392730 |
| S     | 0.039935                | -0.923948 | -0.469995 |
| S     | 4.327830                | 0.380791  | -0.476885 |
| C     | 2.786984                | -0.497127 | -0.527997 |
| C     | 3.018755                | -1.915165 | -0.736950 |
| C     | 4.302980                | -2.285788 | -0.843711 |
| C     | 5.321967                | -1.181172 | -0.734360 |
| C     | -0.449876               | 3.088209  | 0.158423  |
| C     | 1.841350                | 2.721408  | -0.019204 |
| N     | 0.825759                | 3.666523  | 0.178177  |
| C     | 1.056291                | 5.085679  | 0.381120  |
| H     | 0.579361                | 5.665451  | -0.413253 |
| H     | 0.645306                | 5.401491  | 1.343129  |
| H     | 2.134060                | 5.248983  | 0.364840  |
| O     | 3.030789                | 2.971814  | -0.053490 |
| O     | -1.485768               | 3.706097  | 0.306493  |
| H     | -5.139248               | -1.656203 | -0.447933 |
| H     | -2.594991               | -1.827965 | -0.594355 |

|   |           |           |           |
|---|-----------|-----------|-----------|
| H | 2.193334  | -2.617234 | -0.788814 |
| H | 4.647419  | -3.304236 | -0.980279 |
| C | -6.246722 | 0.979024  | 0.063735  |
| C | -7.474419 | 0.237501  | 0.085168  |
| C | -7.772882 | -0.990726 | 0.604482  |
| C | -9.162132 | -1.597588 | 0.432956  |
| C | -9.180380 | -2.648162 | -0.595393 |
| C | -6.865150 | -1.765308 | 1.380931  |
| N | -6.165519 | -2.424842 | 2.040284  |
| N | -9.172707 | -3.469135 | -1.415540 |
| H | -6.374858 | 2.059582  | 0.061348  |
| H | -8.324331 | 0.772164  | -0.340498 |
| H | -9.875395 | -0.818587 | 0.142726  |
| H | -9.517470 | -2.030616 | 1.375167  |
| C | 6.220038  | -1.055409 | -1.948911 |
| C | 7.485938  | -1.210227 | -1.534573 |
| C | 7.416395  | -1.432704 | -0.072882 |
| C | 8.647381  | -1.655480 | 0.770238  |
| C | 8.375986  | -1.923626 | 2.183437  |
| N | 6.222529  | -1.415530 | 0.408379  |
| N | 8.208220  | -2.145382 | 3.308805  |
| H | 5.848812  | -0.869831 | -2.947990 |
| H | 8.391970  | -1.180316 | -2.127882 |
| H | 9.224589  | -2.491972 | 0.354465  |
| H | 9.297748  | -0.773552 | 0.693183  |

## 2. Compound A2

|   |           |           |           |
|---|-----------|-----------|-----------|
| S | 4.008123  | -0.515321 | -0.070960 |
| C | 5.176257  | -1.846867 | -0.112476 |
| C | 2.641259  | -1.646159 | -0.054352 |
| C | 4.482679  | -3.106047 | -0.112426 |
| C | 3.125111  | -2.991936 | -0.077336 |
| C | 1.306909  | -1.266611 | -0.027972 |
| C | 0.688923  | 0.007828  | -0.015172 |
| C | -0.689963 | 0.007134  | 0.011983  |
| C | -1.306633 | -1.267736 | 0.025511  |
| S | 0.000540  | -2.493931 | -0.002874 |
| S | -4.007317 | -0.516287 | 0.071107  |
| C | -2.640870 | -1.647527 | 0.053629  |
| C | -3.124917 | -2.993155 | 0.077463  |
| C | -4.482519 | -3.106885 | 0.113123  |
| C | -5.175824 | -1.847525 | 0.112796  |
| C | 1.163454  | 1.422003  | -0.025760 |
| C | -1.164432 | 1.421313  | 0.029080  |

|   |            |           |           |
|---|------------|-----------|-----------|
| N | -0.001343  | 2.199635  | 0.005301  |
| C | -0.008479  | 3.653374  | -0.003560 |
| H | 0.970758   | 3.997616  | 0.329814  |
| H | -0.204811  | 4.036042  | -1.009317 |
| H | -0.789031  | 4.009449  | 0.670457  |
| O | -2.295058  | 1.866149  | 0.063029  |
| O | 2.295526   | 1.863600  | -0.051677 |
| H | 5.017864   | -4.047384 | -0.131693 |
| H | 2.455434   | -3.844302 | -0.065036 |
| H | -2.455378  | -3.845636 | 0.065422  |
| H | -5.017946  | -4.048069 | 0.133232  |
| C | 6.556883   | -1.704149 | -0.082072 |
| C | 7.336764   | -0.456927 | -0.083857 |
| C | 6.862127   | 0.732638  | -0.675666 |
| C | 7.615923   | 1.898262  | -0.642511 |
| C | 8.862820   | 1.879392  | -0.021296 |
| C | 9.377692   | 0.716527  | 0.551087  |
| C | 8.617994   | -0.443022 | 0.511620  |
| N | 7.917215   | -3.907599 | 0.089645  |
| C | 7.306077   | -2.918350 | 0.009871  |
| H | 5.915857   | 0.745126  | -1.201750 |
| H | 7.259855   | 2.813088  | -1.098553 |
| H | 10.354556  | 0.738069  | 1.017000  |
| H | 9.012422   | -1.350545 | 0.955676  |
| N | 9.661172   | 3.113311  | 0.019921  |
| O | 9.177213   | 4.123927  | -0.490672 |
| O | 10.764690  | 3.061068  | 0.563264  |
| C | -6.556434  | -1.704537 | 0.082578  |
| C | -7.305682  | -2.918719 | -0.009050 |
| C | -7.336166  | -0.457230 | 0.083958  |
| C | -6.860902  | 0.732884  | 0.674198  |
| C | -7.614563  | 1.898583  | 0.640455  |
| C | -8.861955  | 1.879277  | 0.020258  |
| C | -9.377440  | 0.715912  | -0.550559 |
| C | -8.617883  | -0.443698 | -0.510533 |
| N | -7.916755  | -3.908032 | -0.088476 |
| H | -5.914230  | 0.745879  | 1.199528  |
| H | -7.257954  | 2.813842  | 1.095198  |
| H | -10.354666 | 0.737123  | -1.015726 |
| H | -9.012797  | -1.351574 | -0.953423 |
| N | -9.660171  | 3.113270  | -0.021564 |
| O | -10.763952 | 3.060721  | -0.564345 |
| O | -9.175861  | 4.124223  | 0.488018  |

### 3. Compound A3

|   |            |           |           |
|---|------------|-----------|-----------|
| S | -4.013765  | -0.629773 | -0.000140 |
| C | -5.187023  | -1.962753 | -0.000179 |
| C | -2.642549  | -1.757934 | 0.000272  |
| C | -4.483511  | -3.218132 | -0.000308 |
| C | -3.126251  | -3.106077 | -0.000043 |
| C | -1.309846  | -1.376626 | 0.000969  |
| C | -0.690975  | -0.102687 | 0.001077  |
| C | 0.689552   | -0.101805 | 0.000832  |
| C | 1.310073   | -1.375203 | 0.000603  |
| S | 0.000691   | -2.604773 | 0.002580  |
| S | 4.014394   | -0.628251 | -0.000825 |
| C | 2.642881   | -1.756100 | -0.000250 |
| C | 3.126499   | -3.104337 | -0.000471 |
| C | 4.483703   | -3.216653 | -0.000635 |
| C | 5.187440   | -1.961409 | -0.000513 |
| C | -1.165599  | 1.310092  | -0.002231 |
| C | 1.163901   | 1.310995  | -0.003011 |
| N | -0.002051  | 2.089262  | -0.006452 |
| C | -0.010165  | 3.541662  | 0.001685  |
| H | -0.785632  | 3.899758  | -0.677549 |
| H | -0.213401  | 3.925878  | 1.005740  |
| H | 0.971766   | 3.884980  | -0.324890 |
| O | 2.295199   | 1.757299  | -0.007481 |
| O | -2.295485  | 1.760094  | -0.005690 |
| H | -5.018613  | -4.161184 | -0.000632 |
| H | -2.453171  | -3.955793 | -0.000115 |
| H | 2.453362   | -3.954002 | -0.000537 |
| H | 5.018615   | -4.159810 | -0.000872 |
| C | -6.555880  | -1.867897 | -0.000123 |
| C | -7.443686  | -0.727802 | 0.000240  |
| C | -7.028205  | 0.626574  | 0.001065  |
| C | -7.952803  | 1.659927  | 0.001490  |
| C | -9.315438  | 1.358507  | 0.001064  |
| C | -9.769859  | 0.038264  | 0.000263  |
| C | -8.838108  | -0.985558 | -0.000119 |
| H | -5.977295  | 0.885333  | 0.001506  |
| H | -7.638435  | 2.695880  | 0.002179  |
| H | -10.834293 | -0.158585 | -0.000023 |
| H | -9.184193  | -2.014988 | -0.000723 |
| N | -10.291764 | 2.451066  | 0.001499  |
| O | -9.861628  | 3.606307  | 0.002134  |
| O | -11.487813 | 2.151051  | 0.001204  |
| C | 6.556330   | -1.866923 | -0.000227 |
| C | 7.444514   | -0.727140 | 0.000192  |

|   |           |           |           |
|---|-----------|-----------|-----------|
| C | 7.029475  | 0.627369  | 0.000792  |
| C | 7.954396  | 1.660425  | 0.001325  |
| C | 9.316942  | 1.358583  | 0.001255  |
| C | 9.770931  | 0.038197  | 0.000669  |
| C | 8.838859  | -0.985331 | 0.000157  |
| H | 5.978631  | 0.886392  | 0.000978  |
| H | 7.640388  | 2.696486  | 0.001839  |
| H | 10.835302 | -0.158997 | 0.000633  |
| H | 9.184616  | -2.014871 | -0.000281 |
| N | 10.293590 | 2.450828  | 0.001827  |
| O | 11.489552 | 2.150460  | 0.001824  |
| O | 9.863807  | 3.606211  | 0.002281  |
| H | -7.061741 | -2.831688 | -0.000252 |
| H | 7.061895  | -2.830870 | -0.000150 |

#### 4. Compound A4

|   |           |           |           |
|---|-----------|-----------|-----------|
| S | -4.016268 | -0.452722 | -0.001639 |
| C | -5.188984 | -1.787467 | -0.001219 |
| C | -2.643120 | -1.579474 | -0.000869 |
| C | -4.483267 | -3.041731 | -0.001119 |
| C | -3.126305 | -2.928152 | -0.000886 |
| C | -1.310958 | -1.198063 | 0.000037  |
| C | -0.689746 | 0.075182  | 0.000316  |
| C | 0.691093  | 0.074162  | 0.001100  |
| C | 1.310421  | -1.199689 | 0.001094  |
| S | -0.000904 | -2.428252 | 0.002077  |
| S | 4.015257  | -0.454365 | 0.000722  |
| C | 2.642496  | -1.581523 | 0.000676  |
| C | 3.125806  | -2.930081 | 0.000242  |
| C | 4.482839  | -3.043317 | 0.000226  |
| C | 5.188241  | -1.788848 | 0.000699  |
| C | -1.164023 | 1.487437  | -0.003649 |
| C | 1.165701  | 1.486437  | -0.001937 |
| N | 0.002283  | 2.265947  | -0.006630 |
| C | 0.011607  | 3.717877  | 0.000762  |
| H | -0.981765 | 4.060298  | -0.290196 |
| H | 0.251354  | 4.101903  | 0.996796  |
| H | 0.761294  | 4.078008  | -0.706119 |
| O | 2.295219  | 1.938026  | -0.004580 |
| O | -2.295159 | 1.934760  | -0.008250 |
| H | -5.017076 | -3.985569 | -0.001138 |
| H | -2.452388 | -3.777205 | -0.000657 |
| H | 2.451975  | -3.779209 | -0.000174 |
| H | 5.016907  | -3.987011 | -0.000212 |

|   |            |           |           |
|---|------------|-----------|-----------|
| C | -6.557243  | -1.693423 | -0.000889 |
| C | -7.446386  | -0.553482 | -0.000112 |
| C | -7.033346  | 0.800533  | -0.000111 |
| C | -7.959216  | 1.832329  | 0.001133  |
| C | -9.337711  | 1.553776  | 0.002318  |
| C | -9.770530  | 0.214968  | 0.002176  |
| C | -8.839908  | -0.809538 | 0.000992  |
| H | -5.982407  | 1.059813  | -0.001163 |
| H | -7.622027  | 2.863262  | 0.001215  |
| H | -10.832396 | -0.006233 | 0.003036  |
| H | -9.186446  | -1.839028 | 0.000958  |
| C | 6.556489   | -1.694436 | 0.000545  |
| C | 7.445287   | -0.554233 | 0.000837  |
| C | 7.031871   | 0.799666  | 0.002291  |
| C | 7.957476   | 1.831734  | 0.002517  |
| C | 9.336039   | 1.553539  | 0.001274  |
| C | 9.769233   | 0.214844  | -0.000181 |
| C | 8.838901   | -0.809928 | -0.000365 |
| H | 5.980871   | 1.058722  | 0.003432  |
| H | 7.619972   | 2.862563  | 0.003713  |
| H | 10.831161  | -0.006054 | -0.001125 |
| H | 9.185724   | -1.839320 | -0.001483 |
| H | -7.062870  | -2.657466 | -0.000691 |
| H | 7.062388   | -2.658338 | 0.000216  |
| C | -10.290634 | 2.620793  | 0.003673  |
| C | 10.288681  | 2.620772  | 0.001524  |
| N | -11.067465 | 3.487675  | 0.004787  |
| N | 11.065334  | 3.487811  | 0.001714  |

## 5. Compound A5

|   |           |           |           |
|---|-----------|-----------|-----------|
| S | 4.019475  | 0.295903  | 0.165101  |
| C | 5.181463  | 1.638972  | 0.038619  |
| C | 2.643242  | 1.414914  | 0.092437  |
| C | 4.469973  | 2.892781  | -0.039368 |
| C | 3.118033  | 2.768085  | -0.015446 |
| C | 1.312848  | 1.040272  | 0.131438  |
| C | 0.687994  | -0.229534 | 0.237854  |
| C | -0.690361 | -0.228172 | 0.237197  |
| C | -1.312486 | 1.042484  | 0.130480  |
| S | 0.001109  | 2.268021  | 0.034947  |
| S | -4.018481 | 0.298238  | 0.163850  |
| C | -2.642755 | 1.417740  | 0.091141  |
| C | -3.117560 | 2.770713  | -0.017772 |

|   |           |           |           |
|---|-----------|-----------|-----------|
| C | -4.469584 | 2.894982  | -0.042360 |
| C | -5.180762 | 1.641011  | 0.036228  |
| C | 1.163520  | -1.635944 | 0.368406  |
| C | -1.166222 | -1.634717 | 0.367459  |
| N | -0.003432 | -2.412337 | 0.429104  |
| C | -0.016592 | -3.857342 | 0.561971  |
| H | 1.018790  | -4.198184 | 0.541676  |
| H | -0.486179 | -4.150541 | 1.504840  |
| H | -0.575014 | -4.305802 | -0.263268 |
| O | -2.294894 | -2.083253 | 0.423459  |
| O | 2.294627  | -2.078088 | 0.424392  |
| H | 4.999279  | 3.835708  | -0.118463 |
| H | 2.435414  | 3.608448  | -0.071708 |
| H | -2.434993 | 3.611110  | -0.074270 |
| H | -4.999156 | 3.837694  | -0.122269 |
| C | 6.538593  | 1.524392  | 0.088567  |
| C | 7.341320  | 0.302341  | 0.175651  |
| C | 7.191438  | -0.806885 | -0.697803 |
| C | 7.970057  | -1.964262 | -0.522491 |
| C | 8.918191  | -2.029317 | 0.491560  |
| C | 9.113154  | -0.924147 | 1.325865  |
| C | 8.342101  | 0.221388  | 1.161418  |
| H | 7.832136  | -2.796726 | -1.204195 |
| H | 9.863660  | -0.959437 | 2.109691  |
| H | 8.486689  | 1.070271  | 1.823169  |
| C | -6.537880 | 1.526078  | 0.086241  |
| C | -7.339935 | 0.303713  | 0.174745  |
| C | -7.189031 | -0.806492 | -0.697389 |
| C | -7.966568 | -1.964361 | -0.520657 |
| C | -8.914478 | -2.029117 | 0.493623  |
| C | -9.110257 | -0.923219 | 1.326753  |
| C | -8.340358 | 0.222883  | 1.160866  |
| H | -7.827831 | -2.797576 | -1.201275 |
| H | -9.860535 | -0.958363 | 2.110807  |
| H | -8.485717 | 1.072384  | 1.821653  |
| H | 7.091990  | 2.459474  | 0.155271  |
| H | -7.091630 | 2.460972  | 0.152633  |
| H | 9.513608  | -2.927338 | 0.619856  |
| H | -9.508996 | -2.927560 | 0.623097  |
| C | 6.331816  | -0.747897 | -1.843448 |
| C | -6.329183 | -0.748048 | -1.842880 |
| N | 5.676228  | -0.722160 | -2.804015 |
| N | -5.673001 | -0.722388 | -2.803069 |

## 6. Compound A6

|   |            |           |           |
|---|------------|-----------|-----------|
| S | -4.019218  | -0.797427 | -0.030902 |
| C | -5.189707  | -2.135962 | -0.045454 |
| C | -2.642913  | -1.921457 | -0.024201 |
| C | -4.479682  | -3.388609 | -0.045627 |
| C | -3.123680  | -3.271804 | -0.033510 |
| C | -1.311782  | -1.539484 | -0.011850 |
| C | -0.689166  | -0.266384 | -0.006508 |
| C | 0.691650   | -0.267867 | 0.004543  |
| C | 1.311451   | -1.541850 | 0.010795  |
| S | -0.001117  | -2.770661 | -0.000289 |
| S | 4.018172   | -0.799870 | 0.030052  |
| C | 2.642442   | -1.924479 | 0.023548  |
| C | 3.123378   | -3.274638 | 0.033546  |
| C | 4.479494   | -3.390936 | 0.046023  |
| C | 5.189061   | -2.138023 | 0.045560  |
| C | -1.163516  | 1.145351  | -0.010699 |
| C | 1.166408   | 1.143958  | 0.007769  |
| N | 0.003570   | 1.924150  | -0.001665 |
| C | 0.017107   | 3.375646  | -0.003455 |
| H | -1.019207  | 3.713794  | 0.010497  |
| H | 0.544450   | 3.750079  | 0.877485  |
| H | 0.519071   | 3.750455  | -0.899210 |
| O | 2.295294   | 1.597443  | 0.016652  |
| O | -2.294890  | 1.592354  | -0.019342 |
| H | -5.011149  | -4.333804 | -0.054134 |
| H | -2.447593  | -4.119137 | -0.031520 |
| H | 2.447423   | -4.122084 | 0.031795  |
| H | 5.011326   | -4.335923 | 0.055108  |
| C | -6.556659  | -2.045959 | -0.053596 |
| C | -7.452166  | -0.907718 | -0.048949 |
| C | -7.045168  | 0.446602  | -0.041931 |
| C | -7.980337  | 1.473471  | -0.033266 |
| C | -9.347705  | 1.185216  | -0.034501 |
| C | -9.776814  | -0.145283 | -0.045261 |
| C | -8.843025  | -1.170163 | -0.053262 |
| H | -7.650087  | 2.506437  | -0.033594 |
| H | -10.838025 | -0.368075 | -0.055166 |
| H | -9.185345  | -2.201143 | -0.064811 |
| C | 6.555986   | -2.047403 | 0.054263  |
| C | 7.450944   | -0.908728 | 0.049779  |
| C | 7.043350   | 0.445419  | 0.042570  |
| C | 7.978093   | 1.472680  | 0.034211  |
| C | 9.345585   | 1.185000  | 0.035883  |

|   |            |           |           |
|---|------------|-----------|-----------|
| C | 9.775274   | -0.145307 | 0.046790  |
| C | 8.841923   | -1.170581 | 0.054551  |
| H | 7.647365   | 2.505489  | 0.034481  |
| H | 10.836571  | -0.367655 | 0.057010  |
| H | 9.184687   | -2.201411 | 0.066243  |
| H | -7.059399  | -3.011615 | -0.061847 |
| H | 7.059179   | -3.012820 | 0.062984  |
| H | -5.995285  | 0.710550  | -0.045484 |
| H | 5.993389   | 0.709055  | 0.045806  |
| C | -10.353809 | 2.297875  | 0.043972  |
| F | -9.901865  | 3.429859  | -0.541447 |
| F | -10.649642 | 2.612046  | 1.328552  |
| F | -11.520380 | 1.964534  | -0.554861 |
| C | 10.351186  | 2.298181  | -0.042066 |
| F | 9.898485   | 3.429784  | 0.543509  |
| F | 11.517693  | 1.965178  | 0.557128  |
| F | 10.647462  | 2.612724  | -1.326464 |

## 7. Compound A7

|   |           |           |           |
|---|-----------|-----------|-----------|
| S | 4.009505  | -0.310066 | -0.053721 |
| C | 5.178571  | -1.641721 | -0.079197 |
| C | 2.642124  | -1.440312 | -0.080064 |
| C | 4.484592  | -2.900115 | -0.107397 |
| C | 3.126439  | -2.785788 | -0.104094 |
| C | 1.307657  | -1.060226 | -0.079409 |
| C | 0.689341  | 0.213898  | -0.068545 |
| C | -0.690328 | 0.213157  | -0.068810 |
| C | -1.307257 | -1.061418 | -0.079826 |
| S | 0.000675  | -2.287717 | -0.091934 |
| S | -4.008687 | -0.311162 | -0.054356 |
| C | -2.641648 | -1.441791 | -0.080738 |
| C | -3.126144 | -2.787132 | -0.104992 |
| C | -4.484354 | -2.901105 | -0.108421 |
| C | -5.178052 | -1.642542 | -0.080022 |
| C | 1.163859  | 1.627666  | -0.067060 |
| C | -1.164978 | 1.626949  | -0.067897 |
| N | -0.001598 | 2.405402  | -0.062804 |
| C | -0.008873 | 3.858809  | -0.072287 |
| H | 0.966162  | 4.202749  | 0.273502  |
| H | -0.192143 | 4.241434  | -1.080618 |
| H | -0.797649 | 4.215961  | 0.591614  |
| O | -2.295763 | 2.073206  | -0.069094 |

|   |            |           |           |
|---|------------|-----------|-----------|
| O | 2.295957   | 2.070484  | -0.067183 |
| H | 5.019746   | -3.841572 | -0.122388 |
| H | 2.456526   | -3.637985 | -0.115321 |
| H | -2.456356  | -3.639431 | -0.116309 |
| H | -5.019745  | -3.842425 | -0.123619 |
| C | 6.557973   | -1.499003 | -0.015843 |
| C | 7.338650   | -0.252546 | 0.007594  |
| C | 6.877448   | 0.943141  | -0.580650 |
| C | 7.632617   | 2.106102  | -0.523685 |
| C | 8.882066   | 2.106136  | 0.117805  |
| C | 9.367628   | 0.915260  | 0.685921  |
| C | 8.609171   | -0.243231 | 0.624099  |
| H | 5.939955   | 0.962386  | -1.122288 |
| H | 7.264625   | 3.015774  | -0.985259 |
| H | 10.336002  | 0.908347  | 1.174056  |
| H | 8.996007   | -1.154919 | 1.066725  |
| C | -6.557432  | -1.499511 | -0.016727 |
| C | -7.337869  | -0.252920 | 0.007275  |
| C | -6.876162  | 0.943227  | -0.579657 |
| C | -7.631126  | 2.106292  | -0.521994 |
| C | -8.880893  | 2.105984  | 0.118869  |
| C | -9.366970  | 0.914677  | 0.685653  |
| C | -8.608707  | -0.243899 | 0.623159  |
| H | -5.938411  | 0.962881  | -1.120818 |
| H | -7.262666  | 3.016315  | -0.982496 |
| H | -10.335588 | 0.907504  | 1.173300  |
| H | -8.995952  | -1.155891 | 1.064795  |
| C | 9.659518   | 3.306873  | 0.181413  |
| C | -9.658159  | 3.306803  | 0.183207  |
| N | 10.290021  | 4.283354  | 0.233304  |
| N | -10.288549 | 4.283325  | 0.235697  |
| C | 7.304624   | -2.714144 | 0.084189  |
| C | -7.304331  | -2.714557 | 0.082759  |
| N | 7.914854   | -3.703408 | 0.171257  |
| N | -7.914721  | -3.703761 | 0.169365  |

## 8. Compound A8

|   |           |           |           |
|---|-----------|-----------|-----------|
| S | -4.006766 | -0.079449 | -0.190790 |
| C | -5.163192 | -1.419048 | -0.198469 |
| C | -2.638711 | -1.206584 | -0.125265 |
| C | -4.472612 | -2.681312 | -0.177849 |
| C | -3.118462 | -2.559268 | -0.134329 |
| C | -1.307113 | -0.831129 | -0.068511 |

|   |           |           |           |
|---|-----------|-----------|-----------|
| C | -0.686982 | 0.444346  | -0.039618 |
| C | 0.688218  | 0.443237  | 0.039826  |
| C | 1.306230  | -0.832901 | 0.068843  |
| S | -0.001256 | -2.059549 | 0.001890  |
| S | 4.005552  | -0.081412 | 0.190263  |
| C | 2.637787  | -1.208853 | 0.123818  |
| C | 3.117588  | -2.561475 | 0.130437  |
| C | 4.471800  | -2.683306 | 0.173165  |
| C | 5.162132  | -1.420912 | 0.196134  |
| C | -1.160923 | 1.858055  | -0.082098 |
| C | 1.162690  | 1.857095  | 0.075281  |
| N | 0.002808  | 2.635936  | -0.006709 |
| C | 0.014060  | 4.088482  | -0.003571 |
| H | -0.988768 | 4.427673  | -0.263821 |
| H | 0.286097  | 4.470490  | 0.984338  |
| H | 0.738765  | 4.451539  | -0.735150 |
| O | 2.289689  | 2.304156  | 0.158433  |
| O | -2.289618 | 2.299446  | -0.171112 |
| H | -5.010719 | -3.621376 | -0.184076 |
| H | -2.442589 | -3.406338 | -0.103242 |
| H | 2.441738  | -3.408515 | 0.097909  |
| H | 5.010073  | -3.623286 | 0.177642  |
| C | -6.529035 | -1.241907 | -0.263016 |
| C | -7.215053 | 0.074979  | -0.226082 |
| C | -7.076951 | 0.963779  | 0.868301  |
| C | -7.723909 | 2.210453  | 0.853339  |
| C | -8.521882 | 2.573186  | -0.226555 |
| C | -8.691452 | 1.687614  | -1.293468 |
| C | -8.047929 | 0.452553  | -1.288310 |
| H | -7.603696 | 2.875794  | 1.701361  |
| H | -9.322351 | 1.960572  | -2.133461 |
| H | -8.177657 | -0.233383 | -2.119241 |
| C | 6.527946  | -1.243829 | 0.261723  |
| C | 7.213725  | 0.073304  | 0.228870  |
| C | 7.076393  | 0.965277  | -0.862968 |
| C | 7.722573  | 2.212291  | -0.843454 |
| C | 8.518877  | 2.572310  | 0.238564  |
| C | 8.687583  | 1.683703  | 1.303093  |
| C | 8.044882  | 0.448251  | 1.293380  |
| H | 7.603135  | 2.880034  | -1.689692 |
| H | 9.317101  | 1.954618  | 2.144781  |
| H | 8.173915  | -0.240074 | 2.122444  |
| H | -9.018980 | 3.537678  | -0.230150 |
| H | 9.015334  | 3.537112  | 0.245711  |
| C | -6.333620 | 0.594287  | 2.037769  |

|   |           |           |           |
|---|-----------|-----------|-----------|
| C | 6.334700  | 0.598662  | -2.034349 |
| N | -5.750143 | 0.311763  | 3.003250  |
| N | 5.752450  | 0.318024  | -3.001142 |
| C | -7.354534 | -2.388257 | -0.439916 |
| N | -8.036280 | -3.321658 | -0.598249 |
| C | 7.353425  | -2.390476 | 0.436786  |
| N | 8.035171  | -3.324128 | 0.593606  |

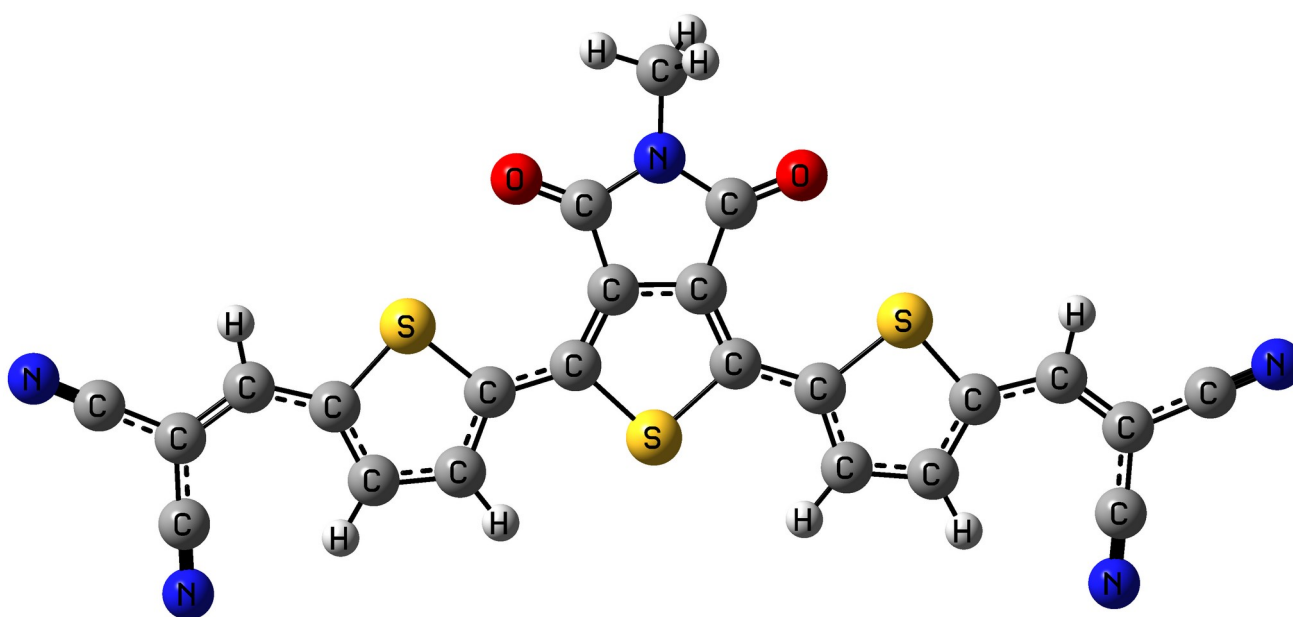

Fig. S1: Optimized structure of the test compound

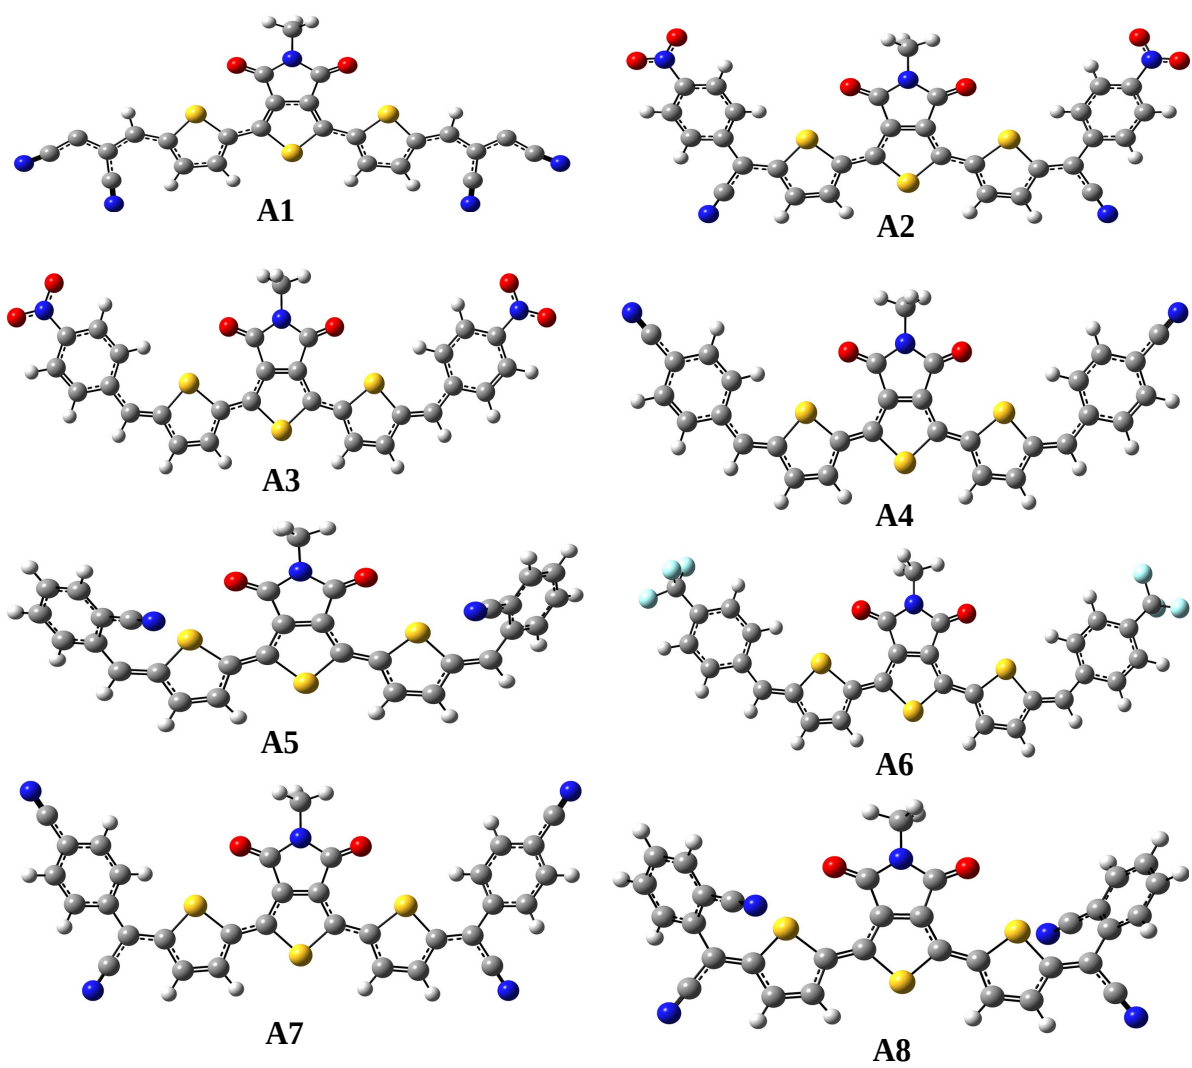

Fig. S2: Optimized structures of the studied compounds.

Table S2: Energies of HOMO, LUMO,  $\Delta_{H-L}$ , and  $\lambda_{\max}$  values of the test compound with different functional along with 6-31G (d,p) basis set.

| Functional   | HOMO (eV) | LUMO (eV) | $\Delta_{H-L}$ (eV) | $\lambda_{\max}$ (nm) |
|--------------|-----------|-----------|---------------------|-----------------------|
| Experimental | -6.34     | -3.75     | 2.59                | 477                   |
| B3LYP        | -6.45     | -3.84     | 2.61                | 542                   |
| B3LYP-D3     | -6.44     | -3.84     | 2.60                | 544                   |
| B3PW91       | -6.58     | -3.94     | 2.64                | 538                   |
| CAM-B3LYP    | -7.65     | -2.70     | 4.95                | 422                   |
| PBEPBE       | -5.86     | -4.33     | 1.53                | 617                   |
| wB97XD       | -8.23     | -2.19     | 6.04                | 414                   |

Table S3: Validation of basis set.

| Compound | 6-311G (d,p) | 6-31G (d,p) | reported value |
|----------|--------------|-------------|----------------|
| TPD-T-CN | 420 nm       | 422 nm      | 477 nm         |

We have also validated the basis sets used in our calculations. To further evaluate the reliability of the employed basis sets, we conducted additional test calculations using the reference compound TPD-T-CN with both double-zeta and triple-zeta basis sets (6-31G (d,p) and 6-311G (d,p), respectively) with CAM-B3LYP functional. The results of these tests have presented in Table S3. From this Table, it is evident that the double-zeta basis set shows a closer match with the reported results, affirming its appropriateness for our calculations. We are confident that this selected basis set offers a reasonable compromise between computational cost and accuracy for the systems under investigation.

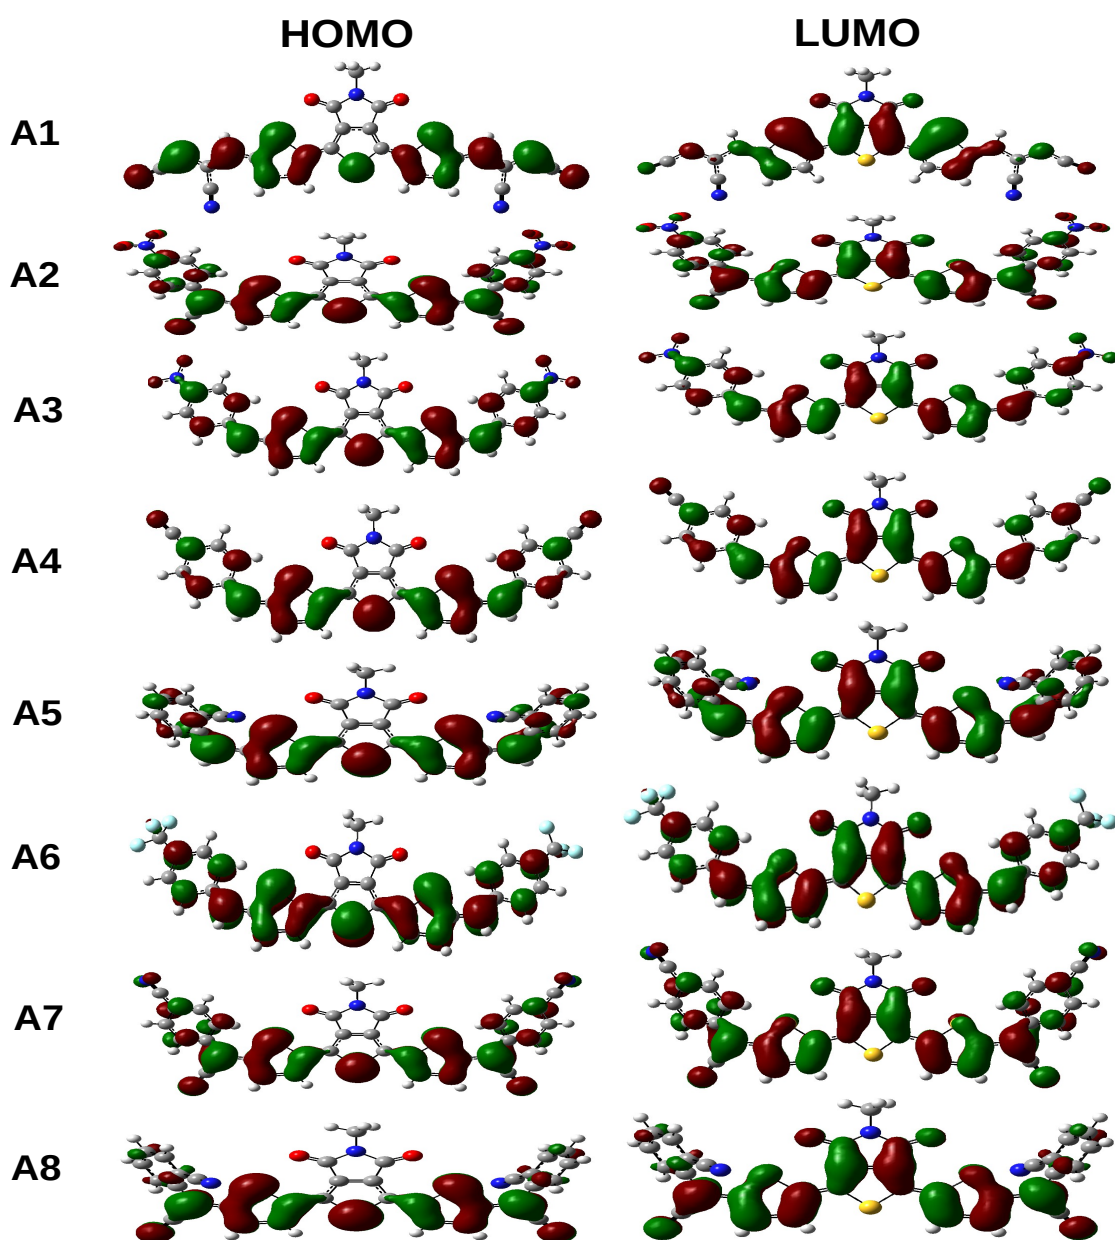

Fig. S3 : FMO diagram of the studied compounds in the solvent phase.

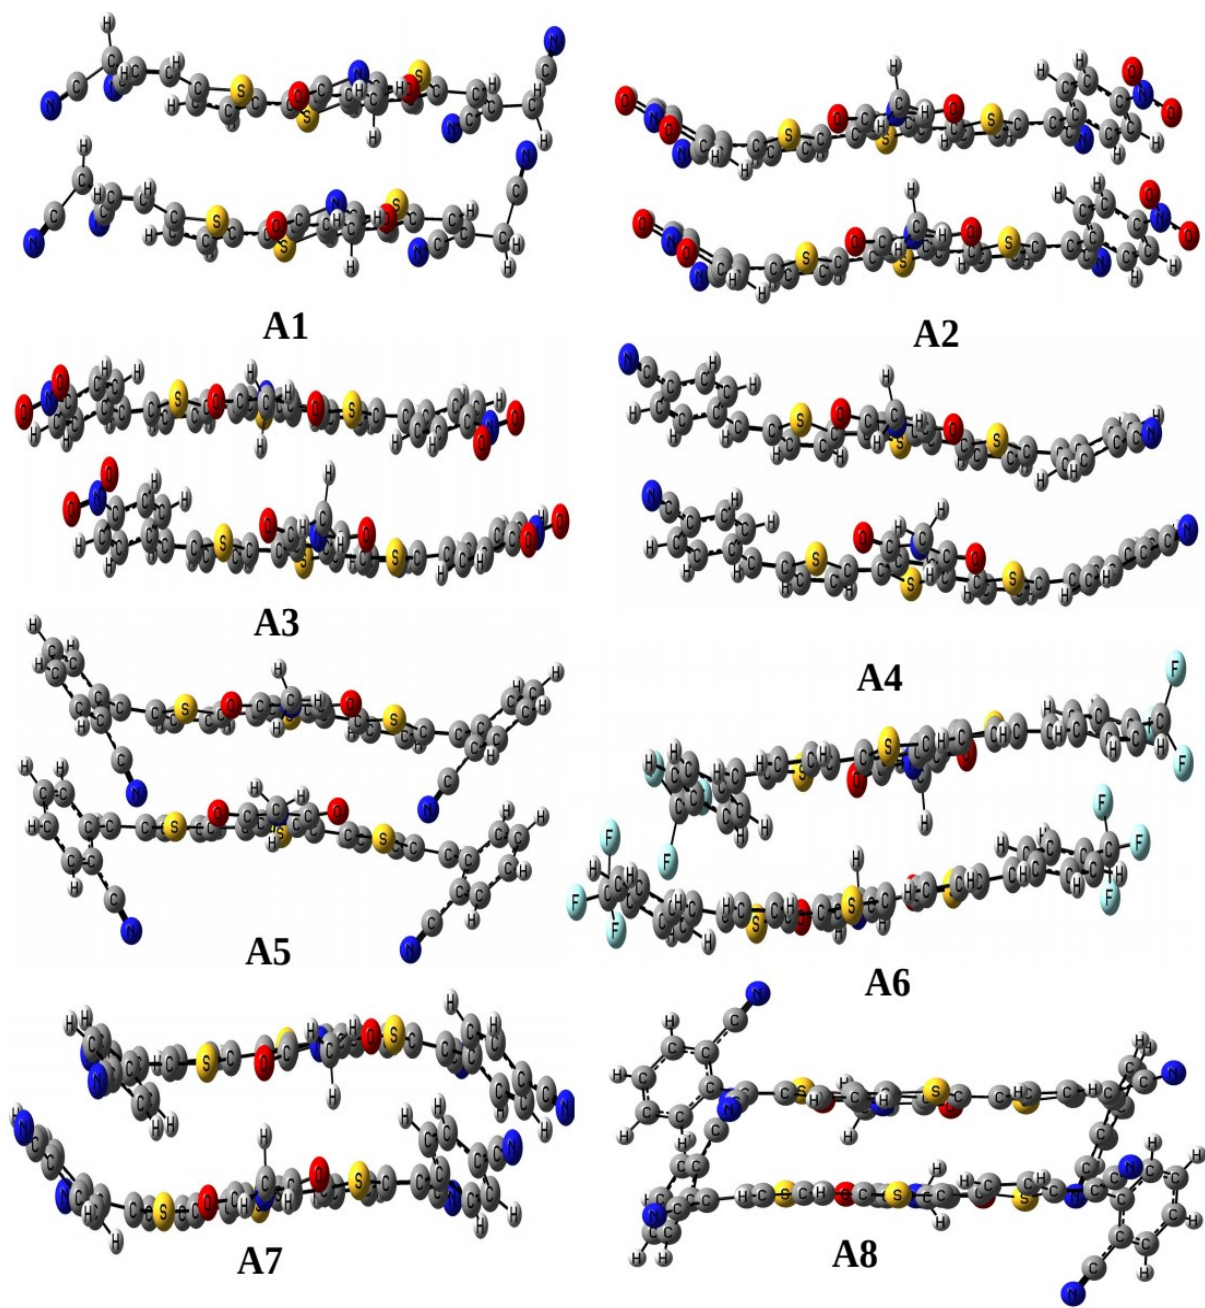

Fig. S4: Optimized structure of two stacked compounds.

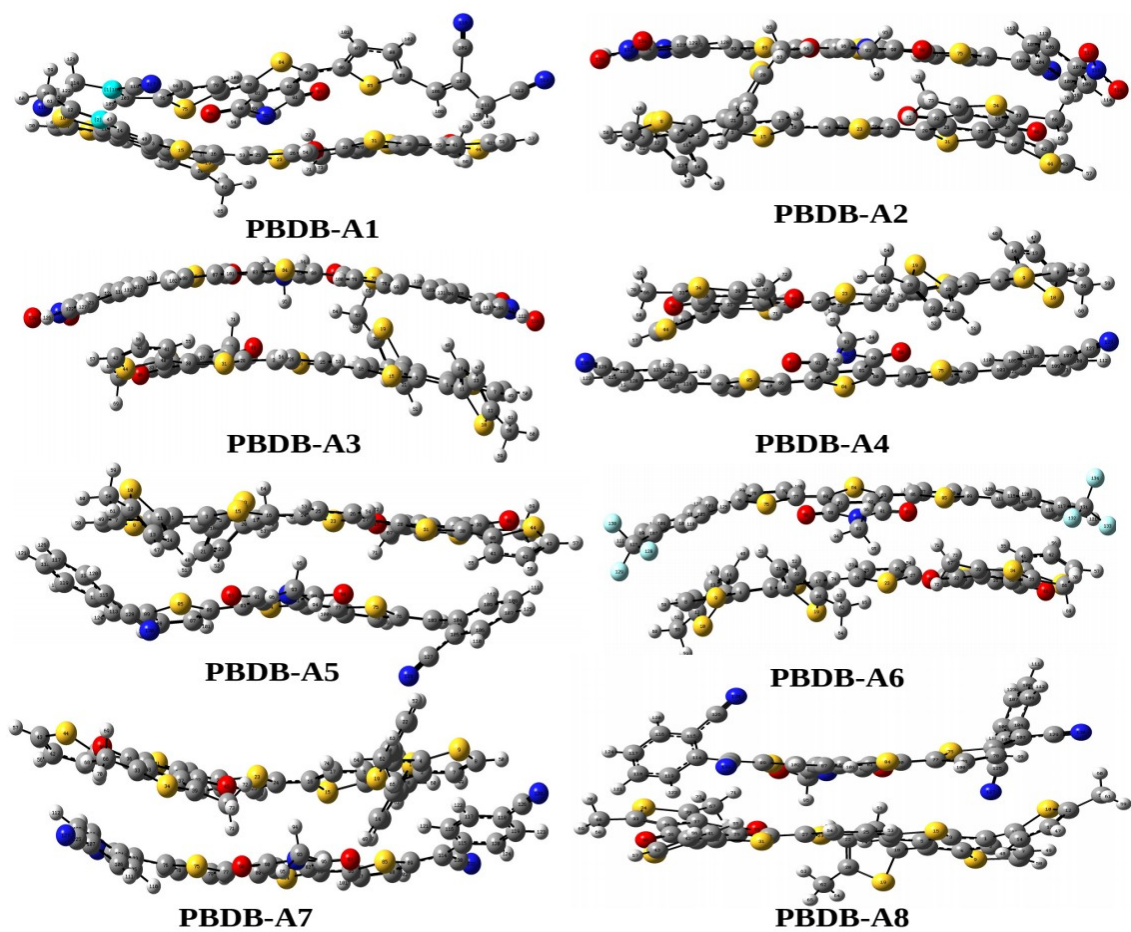

Fig. S5: Optimized structure of D/A blends.
